# Supplementary material for: Impact of bread diet on intestinal dysbiosis and irritable bowel syndrome symptoms in quiescent ulcerative colitis: A pilot study
Source: PLoS One. 2024 Feb 16;19(2):e0297836. doi: 10.1371/journal.pone.0297836 (PMC10871487; doi:10.1371/journal.pone.0297836)
Supplement: S3 Table — Est: Estimate; SD: Standard deviation; P: p-value; Padj: FDR-corrected p-value. (XLSX) [file pone.0297836.s004.xlsx]

## Sheet: S3 Table
S3 Table. Differential abundance analysis of the taxa with an overall prevalence over 10% aggregated at species taxonomic level.
Est: Estimate; SD: Standard deviation; P: p-value; Padj: FDR-corrected p-value
	Pre treatment vs Pre control				Pre treatment vs Post treatment				Pre control vs Post control				Post treatment vs Post control
Taxon (Species)	Est	SD	P	Padj	Est	SD	P	Padj	Est	SD	P	Padj	Est	SD	P	Padj
Acidaminococcus intestini	0.590222	2.8609	0.716923	1	-0.843044	2.31139	0.65144	1	-0.353346	1.95391	0.715754	1	1.88258	2.77294	0.524666	1
Agathobacter NA	-0.955811	1.33657	0.493517	1	-2.45552	1.98509	0.235115	1	-1.075	1.37994	0.45095	1	1.91722	2.43957	0.449808	1
Akkermansia muciniphila	0.817917	3.16285	0.73048	1	-1.36669	2.70749	0.589796	1	-0.883508	2.04249	0.634229	1	1.64551	2.69943	0.554252	1
Alistipes ihumii	-0.67108	2.22244	0.623932	1	-1.43585	2.02438	0.484328	1	-0.597466	1.4636	0.61939	1	0.910643	1.98979	0.5649	1
Alistipes indistinctus	1.26934	2.18909	0.558486	1	3.1929	2.03625	0.17844	0.999098	2.55593	1.56267	0.147615	1	-0.248013	2.30799	0.719085	1
Alistipes inops	-3.98206	2.0823	0.110423	0.982948	-0.487097	2.4914	0.740234	1	-0.180665	1.54725	0.675838	1	-3.27939	2.10661	0.186786	0.996539
Alistipes NA	-1.26295	2.66907	0.646442	1	0.529928	2.3937	0.779211	1	0.390404	1.8733	0.781687	1	-1.33599	2.70074	0.631235	1
Alistipes obesi	1.53526	2.40611	0.533003	1	-1.17737	2.1575	0.572936	1	-0.883106	1.68864	0.573924	1	2.0321	2.43794	0.449346	1
Alistipes putredinis	-2.18007	2.91118	0.476949	1	2.45694	2.56791	0.360718	1	2.57538	1.93633	0.20229	1	-2.01703	2.55988	0.451607	1
Alistipes shahii	-3.95559	2.54621	0.16078	1	-1.69832	2.64979	0.539333	1	-0.567128	1.80385	0.70022	1	-1.32897	2.52235	0.601129	1
Alloprevotella NA	0.0769516	2.79804	0.779808	1	-0.936178	2.54063	0.661396	1	0.919221	1.95528	0.622747	1	3.90876	2.70874	0.190214	1
Anaerostipes hadrus	-0.531137	2.73809	0.774876	1	-1.53425	2.69297	0.575055	1	-1.48386	1.95112	0.473313	1	-0.308745	2.85865	0.783148	1
Anaerostipes NA	-0.971108	2.21929	0.631887	1	1.60315	2.4858	0.52761	1	1.2959	1.67822	0.458718	1	-1.33879	2.50409	0.599797	1
Bacteroides caccae	-2.39821	2.83514	0.41943	1	0.779094	2.64405	0.762821	1	0.110011	2.0068	0.808761	1	-4.07219	2.71987	0.164259	1
Bacteroides coprocola	1.39179	2.37036	0.542779	1	0.18989	2.20333	0.661075	1	0.566713	1.72298	0.654146	1	1.92745	2.51112	0.481707	1
Bacteroides eggerthii	-0.967823	2.70347	0.690203	1	-1.3522	2.57922	0.605248	1	-2.05722	1.88027	0.307654	1	-2.4679	2.70106	0.400297	1
Bacteroides fragilis	3.69228	2.27228	0.156318	1	-0.994199	1.58329	0.480053	1	-1.2127	1.60571	0.47721	1	3.17097	2.06309	0.190073	0.991206
Bacteroides massiliensis	-1.38601	2.7409	0.609271	1	0.84149	2.84619	0.714565	1	0.475875	1.98086	0.748004	1	-1.99463	2.93406	0.523071	1
Bacteroides NA	0.575324	0.656276	0.39398	1	0.90422	0.872091	0.31291	1	-0.54229	1.02037	0.608174	1	-2.42442	1.91728	0.222726	1
Bacteroides ovatus	-3.17708	2.12792	0.203295	0.99579	1.15958	2.67325	0.621427	1	0.821248	1.64149	0.586773	1	-4.28325	2.25779	0.109732	0.988039
Bacteroides plebeius	-1.94856	2.83881	0.515505	1	2.83912	3.29154	0.414681	1	2.94928	2.23724	0.219202	1	-1.30008	3.49604	0.710086	1
Bacteroides stercoris	-0.986229	2.62216	0.663892	1	2.77236	2.88374	0.375219	1	2.82378	1.98541	0.193413	1	-0.971715	2.99946	0.718804	1
Bacteroides thetaiotaomicron	1.00648	2.50579	0.645851	1	2.63419	2.60314	0.355113	1	1.08033	1.83084	0.560715	1	-2.06963	2.69358	0.47468	1
Bacteroides uniformis	-0.0977921	1.36016	0.883172	1	0.297424	1.35826	0.782437	1	1.00431	0.987229	0.318033	1	1.40145	1.45365	0.348845	1
Bacteroides vulgatus	0.896573	2.5756	0.716801	1	0.213366	2.68752	0.836398	1	-0.492338	1.89766	0.776994	1	-0.272571	2.84255	0.858068	1
Barnesiella intestinihominis	2.14267	2.24667	0.395486	1	1.48436	2.23913	0.526753	1	-0.116661	1.60846	0.702568	1	-1.15831	2.35351	0.595642	1
Barnesiella NA	-0.5919	2.59871	0.778073	1	0.451026	2.38647	0.787396	1	0.57934	1.84703	0.735041	1	-0.400777	2.71684	0.829204	1
Bifidobacterium longum	-1.07961	2.70688	0.661338	1	-0.948469	2.51795	0.660348	1	0.0312792	1.8672	0.748482	1	1.47451	2.57381	0.573605	1
Bifidobacterium NA	1.15321	3.16435	0.705577	1	-0.223127	3.10389	0.814046	1	-0.512521	2.17729	0.771607	1	0.819713	3.14171	0.753081	1
Bilophila wadsworthia	4.95274	2.05344	0.0491893	0.907827	1.28418	1.62469	0.446506	1	0.582087	1.61049	0.638922	1	3.83197	2.17514	0.127711	1
Blautia faecis	2.6083	2.23004	0.267205	1	-1.80932	2.67366	0.522275	1	-0.364822	1.63538	0.787775	1	5.357	2.08009	0.01789	1
Blautia massiliensis	-1.1938	2.03175	0.567849	1	-1.01221	2.02513	0.628562	1	-1.17583	1.57523	0.472233	1	-1.53846	2.47352	0.547992	1
Blautia NA	1.91491	1.23548	0.133834	1	1.06828	1.21609	0.395306	1	-0.189913	0.898467	0.793865	1	-0.714901	1.32589	0.615575	1
Blautia obeum	4.95697	2.65	0.0900609	1	-0.861792	2.61305	0.699592	1	-0.675349	1.95216	0.702859	1	5.8051	2.43812	0.0357407	0.994053
Butyricicoccus NA	-0.399251	2.54973	0.80315	1	-0.9672	2.64539	0.703132	1	-1.09974	1.83995	0.563033	1	-0.38015	2.67616	0.768227	1
Butyricimonas NA	-0.685112	2.40037	0.713916	1	0.404572	2.47798	0.772083	1	-0.111957	1.72401	0.759754	1	-1.66566	2.52342	0.525656	1
CAG-56 NA	1.44514	2.40036	0.554358	1	-0.601658	2.02141	0.616515	1	-0.408269	1.63136	0.654071	1	2.08673	2.13631	0.365342	1
Catenibacterium NA	2.54113	2.36055	0.335109	1	-0.76393	1.61114	0.513099	0.997757	-0.772032	1.58184	0.616782	1	2.43963	1.97448	0.303317	0.997487
Christensenellaceae_R-7_group NA	1.75626	2.67493	0.527065	1	0.625035	2.58113	0.688422	1	1.74786	1.92104	0.398262	1	4.10296	2.60412	0.152332	1
Clostridium_sensu_stricto_1 NA	3.90503	2.43495	0.129986	1	1.30976	2.75179	0.636458	1	-1.00082	1.83207	0.589833	1	-0.971922	2.76085	0.721562	1
Colidextribacter NA	-0.342264	1.6872	0.582088	1	1.08655	1.7742	0.51691	1	1.39108	1.31326	0.371372	1	0.867386	1.98746	0.594123	1
Collinsella aerofaciens	2.41333	2.65192	0.384105	1	-1.65599	2.75107	0.56454	1	-2.4524	1.97544	0.238603	1	0.94659	2.97898	0.720053	1
Coprobacter NA	-0.330524	2.2224	0.720224	1	-2.71738	2.00841	0.255887	1	0.852986	1.58874	0.578102	1	6.99898	1.82427	0.00325618	0.302355
Coprococcus catus	0.435461	2.31844	0.767206	1	-3.73877	2.36045	0.154154	1	-2.4969	1.68848	0.167354	1	3.31358	2.43077	0.221487	1
Coprococcus comes	-2.21098	2.50832	0.400761	1	-0.965289	2.23072	0.66668	1	-0.728591	1.78923	0.672142	1	-1.52689	2.51568	0.561095	1
Coprococcus eutactus	0.456105	2.26723	0.68192	1	1.72292	2.35995	0.49423	1	1.09311	1.7071	0.523796	1	-0.885564	2.57445	0.659887	1
Coprococcus NA	-0.596704	2.67373	0.721372	1	-0.7758	2.54508	0.696644	1	-0.181839	1.8343	0.753188	1	0.141262	2.58416	0.748318	1
Desulfovibrio NA	-1.17858	2.64804	0.656189	1	-1.15425	2.59605	0.640737	1	-0.573454	1.77394	0.643355	1	-0.0347803	2.32278	0.705377	1
Dialister invisus	-2.30479	2.76756	0.436099	1	1.28729	3.03747	0.651907	1	0.610028	1.94963	0.685478	1	-3.64081	2.71155	0.226503	1
Dialister NA	-2.60612	2.94326	0.421671	1	0.308177	3.14931	0.795843	1	0.693476	2.0934	0.678921	1	-1.41043	3.03601	0.638312	1
Dorea formicigenerans	0.538629	2.55978	0.762965	1	-4.4274	2.16694	0.0836057	0.981392	-3.52583	1.68361	0.0684579	0.989492	2.25312	2.20129	0.360066	1
Dorea longicatena	-0.383297	1.39752	0.804543	1	-0.0811593	0.70598	0.888999	1	-0.184526	0.933297	0.81724	1	-0.654386	1.32484	0.647013	1
Erysipelotrichaceae_UCG-003 bacterium	-2.27928	1.89538	0.307892	1	-0.13572	2.15885	0.65032	1	0.411272	1.35372	0.623887	1	-0.718817	1.87787	0.575215	1
Escherichia/Shigella NA	-0.104049	2.81742	0.781572	1	-0.781886	2.5418	0.714684	1	0.683661	1.91303	0.694223	1	2.65215	2.68527	0.348133	1
Faecalibacterium NA	-3.3688	2.41453	0.187483	1	-1.40048	2.26594	0.554685	1	-1.31499	1.89803	0.504091	1	-3.4412	2.84081	0.251815	1
Faecalibacterium prausnitzii	0.895065	1.50762	0.56964	1	2.0255	1.40689	0.162473	1	1.21906	0.790651	0.130063	1	-0.724713	0.541758	0.199888	1
Fusicatenibacter saccharivorans	1.96938	2.32301	0.41511	1	0.805108	2.32919	0.711368	1	-0.152704	1.72037	0.817927	1	-0.113399	2.55416	0.845054	1
Incertae_Sedis NA	4.1366	2.2162	0.0895414	1	3.37276	2.24248	0.169493	1	0.733235	1.61888	0.6478	1	-1.39869	2.25208	0.552224	1
Intestinibacter bartlettii	-2.1454	2.8049	0.471871	1	-2.14732	2.65036	0.44616	1	-1.6757	1.80601	0.399529	1	-1.21383	2.29516	0.57615	1
Lachnoclostridium edouardi	2.4797	2.43767	0.353835	1	2.16585	2.42945	0.40791	1	0.339667	1.77212	0.704056	1	-1.66499	2.55069	0.539444	1
Lachnoclostridium NA	2.29805	2.15963	0.351039	1	1.47181	2.00858	0.496609	1	1.18148	1.67368	0.497162	1	2.13893	2.53878	0.444072	1
Lachnospira NA	-2.84387	2.59071	0.309492	1	1.43773	2.5456	0.588361	1	0.88713	1.87197	0.637367	1	-3.98028	2.57837	0.158707	1
Lachnospiraceae_ND3007_group NA	2.3757	2.60123	0.40082	1	0.214105	2.3424	0.729318	1	-1.36043	1.72824	0.466173	1	-0.719565	2.3554	0.661658	1
Lachnospiraceae_NK4A136_group bacterium	-1.09776	2.1119	0.563572	1	2.23659	2.45975	0.400554	1	1.17205	1.592	0.505257	1	-2.99649	2.31095	0.253262	1
Lachnospiraceae_NK4A136_group NA	-0.493185	2.77446	0.789829	1	0.704003	2.73105	0.757655	1	0.650911	1.94749	0.71794	1	-0.646293	2.85563	0.750979	1
Lachnospiraceae_UCG-010 NA	-0.0885913	1.92675	0.624828	1	2.26867	2.14906	0.353134	1	1.21165	1.44618	0.435518	1	-1.91004	2.15705	0.422755	1
Lactobacillus ruminis	1.48021	2.39575	0.556408	1	0.0753358	2.01633	0.654886	1	-0.38192	1.56789	0.657978	1	-0.00119074	2.17662	0.675891	1
Megasphaera NA	-1.40679	2.40908	0.57596	1	0.336405	2.53085	0.721062	1	0.756321	1.73812	0.616851	1	0.0618195	2.52693	0.737241	1
Monoglobus NA	1.04085	2.49641	0.637329	1	2.91286	2.46413	0.287769	1	2.19369	1.75685	0.237143	1	-0.610459	2.59695	0.737103	1
NK4A214_group NA	-3.33131	2.3582	0.191428	1	-3.39102	2.23989	0.161126	1	-1.66793	1.73692	0.358722	1	0.113769	2.53053	0.79694	1
Odoribacter splanchnicus	-3.39275	2.27696	0.172836	1	2.34828	1.6789	0.185226	1	2.47398	1.57093	0.142914	1	-2.90598	1.93926	0.159503	1
Oscillibacter NA	-2.12399	2.6782	0.462206	1	-3.64668	2.32807	0.170162	1	-1.38693	1.80612	0.468551	1	2.58905	2.38553	0.332253	1
Parabacteroides distasonis	2.96589	2.09866	0.181353	1	2.78114	2.23928	0.239356	1	-0.873081	1.72627	0.630673	1	-4.68171	2.54561	0.0895059	1
Parabacteroides merdae	0.351206	2.15891	0.825343	1	-0.192363	2.25131	0.8176	1	-0.994344	1.70362	0.56685	1	-1.08209	2.72581	0.693467	1
Parabacteroides NA	1.23517	2.64535	0.623009	1	1.72634	2.63799	0.536289	1	1.19601	1.89375	0.542014	1	0.66292	2.87153	0.762395	1
Paraprevotella NA	-0.671184	2.94175	0.76875	1	-0.21532	2.83561	0.774755	1	-0.0324753	2.06313	0.7901	1	-0.185287	2.85744	0.783263	1
Paraprevotella xylaniphila	-0.827232	2.32646	0.630061	1	-0.633347	2.2486	0.662679	1	0.143859	1.59896	0.707401	1	0.743753	2.23279	0.639047	1
Phascolarctobacterium faecium	2.38572	2.72743	0.421333	1	0.0923224	2.2691	0.709341	1	0.165636	1.90493	0.70151	1	2.37961	2.68927	0.416743	1
Phascolarctobacterium NA	4.47586	2.72221	0.135085	1	1.13001	2.55345	0.646403	1	0.316635	2.01325	0.75152	1	2.65586	2.84555	0.387651	1
Phascolarctobacterium succinatutens	-2.25957	2.47877	0.402837	1	0.480673	2.79868	0.758035	1	-0.298998	1.73558	0.694591	1	-3.65003	2.3904	0.186384	1
Prevotella copri	1.54518	3.17003	0.627022	1	-0.386105	2.9208	0.757774	1	-0.809621	2.10529	0.683574	1	0.76525	2.78466	0.712245	1
Prevotella NA	-1.45743	3.43941	0.677512	1	-1.74863	3.30794	0.608754	1	-2.04951	2.36297	0.407876	1	-2.3897	3.3227	0.495683	1
Prevotellaceae_NK3B31_group NA	-1.71808	2.73639	0.536075	1	0.566684	3.13401	0.777131	1	-0.220533	1.94259	0.720195	1	-3.12784	2.67003	0.295923	1
Romboutsia NA	0.37669	2.3287	0.826959	1	0.741795	1.94927	0.710133	1	-0.608753	1.69253	0.71451	1	-2.45278	2.45553	0.341519	1
Roseburia inulinivorans	1.11842	2.3049	0.586396	1	0.147287	1.94563	0.647261	1	-0.597517	1.51143	0.634471	1	-0.215752	2.01181	0.680248	1
Roseburia NA	-1.04534	2.07065	0.593875	1	-1.75434	1.85607	0.41365	1	-0.175009	1.4486	0.630319	1	2.1316	1.96388	0.340903	1
Ruminococcus bicirculans	2.28134	2.05602	0.338891	1	0.579113	1.72739	0.55904	1	-0.577003	1.43889	0.621855	1	0.325105	1.90977	0.64898	1
Ruminococcus bromii	-2.10005	2.71865	0.465103	1	0.0104021	2.82698	0.751254	1	2.46703	1.99649	0.250071	1	2.87286	2.90238	0.35539	1
Ruminococcus callidus	-0.941884	2.77889	0.69785	1	-0.99764	2.76707	0.677636	1	-0.00743009	1.92405	0.724447	1	0.970888	2.70444	0.684007	1
Ruminococcus NA	-0.6673	2.62487	0.775657	1	-0.530527	2.51938	0.801147	1	-3.19312	1.91343	0.119599	1	-6.38012	2.56984	0.0287885	0.979547
Slackia isoflavoniconvertens	1.07537	1.95234	0.535498	1	1.06554	1.82947	0.535127	1	0.623944	1.44352	0.592119	1	0.433709	2.07672	0.629452	1
Streptococcus NA	-3.36453	2.83173	0.278874	1	-3.16517	2.72669	0.286506	1	-1.06781	1.90329	0.583119	1	0.722766	2.49731	0.709979	1
Subdoligranulum NA	-0.502299	0.595255	0.412213	1	0.263026	0.470867	0.586817	1	0.334695	0.411761	0.425308	1	-0.318133	0.593302	0.600834	1
Sutterella wadsworthensis	1.69261	2.20194	0.480695	1	-0.876593	1.73366	0.515359	1	-1.16352	1.38628	0.432076	1	1.23421	1.61403	0.473728	1
UBA1819 NA	0.663362	2.18355	0.673977	1	-1.06583	1.82963	0.509913	1	-1.14373	1.41569	0.461643	1	0.784878	1.86683	0.581661	1
UCG-002 NA	-0.429493	1.64652	0.77199	1	-0.118427	1.55116	0.847213	1	-1.11466	1.37378	0.434346	1	-2.26704	2.10563	0.303786	1
UCG-003 NA	0.333019	2.5795	0.758658	1	-0.991422	2.52147	0.680281	1	-0.783708	1.79899	0.63004	1	0.448894	2.54769	0.753223	1
UCG-005 NA	1.35661	2.65909	0.60751	1	0.14675	2.44958	0.740734	1	-0.773786	1.80428	0.633419	1	-0.926564	2.45783	0.64437	1
